# Supplementary material for: Electronic characterization of redox (non)-innocent Fe2S2reference systems: a multi K-edge X-ray spectroscopic study
Source: Royal Society of Chemistry journal article supplement (doi:10.1039/c9ra08903a), 2020-01-01
Supplement: c9ra08903a1.pdf [file c9ra08903a1.pdf]

# Supporting Information

## **Electronic Characterization of Redox (Non)-Innocent Fe<sub>2</sub>S<sub>2</sub> Reference Systems: Multi edge X-ray Spectroscopic study**

J.P.H. Oudsen<sup>a</sup>, B. Venderbosch<sup>a</sup>, T.J. Korstanje<sup>a</sup> and M. Tromp<sup>b</sup>

<sup>a</sup>. Sustainable Materials and Characterization, van 't Hoff Institute for Molecular Sciences, University of Amsterdam, Science Park 904, 1098 XH Amsterdam, The Netherlands.

<sup>b</sup>. Materials Chemistry, Zernike Institute for Advanced Materials, Nijenborgh 4, 9747AG Groningen, the Netherlands.

# 1. IR Spectroscopy

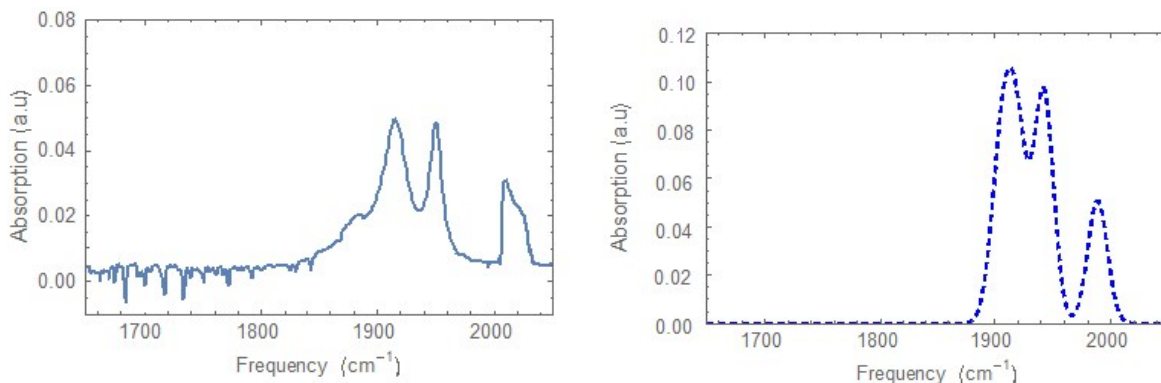

Figure S1. Absorbance difference IR SEC spectra recorded during the first electron reduction of 1.0 mM of [2] in Acetonitrile (0.1 M  $n\text{Bu}_4\text{NPF}_6$ ) within an OTTE cell.

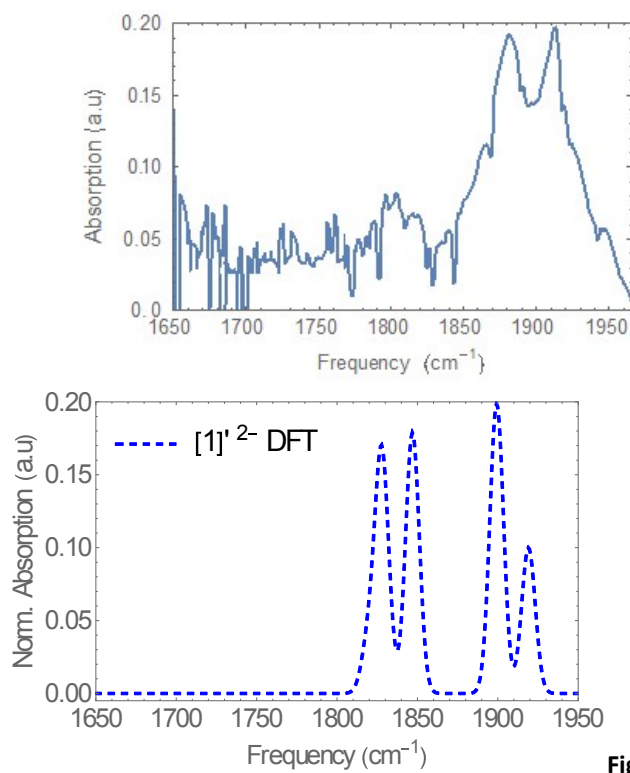

Figure S2. TDDFT calculated spectra of  $[2]^{2-}$  (right) compared to the final spectrum in the spectro-electrochemistry measurement (left).

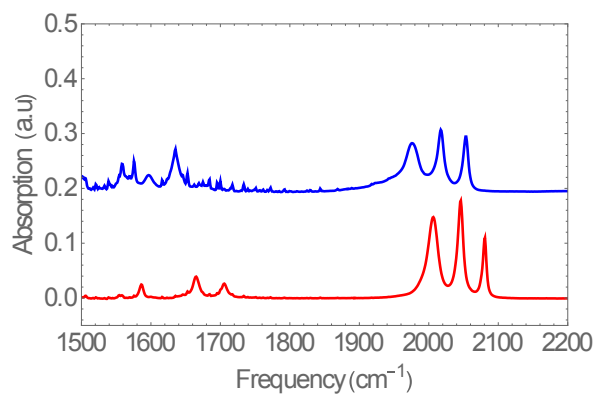

Figure S3. Steady state infrared spectrum of hydrogenase complex [3] (bottom red) and [3] + 1.05 eq. CoCp<sub>2</sub>\* (top blue).

## 2. XAS Analysis

Table S1. Fe K-edge EXAFS fitting parameters for [1]<sup>1-</sup> (DFT geometry optimized), where N = coordination number,  $\sigma^2$  = Debye Waller factor [ $\text{\AA}^{-2}$ ], R = fitted bond length [ $\text{\AA}$ ].

| Sample              | Shell    | N | $\sigma^2$ | $R_{\text{XRD/DFT}}$ ( $\text{\AA}$ ) | $R_{\text{fit}}$ ( $\text{\AA}$ ) |
|---------------------|----------|---|------------|---------------------------------------|-----------------------------------|
| [1] <sup>1-</sup> a | Fe - C   | 3 | 0.004(1)   | 1.80                                  | 1.806(8)                          |
|                     | Fe - S   | 2 | 0.0018(7)  | 2.33                                  | 2.27(1)                           |
|                     | Fe - Fe  | 1 | 0.007(5)   | 2.85                                  | 3.12(4)                           |
|                     | Fe - O   | 3 | 0.011(4)   | 2.93                                  | 2.95(1)                           |
|                     | Fe - CO  | 2 | 0.008(4)   | 2.93                                  | 2.95(1)                           |
|                     | Fe - CO  | 2 | 0.008(4)   | 2.93                                  | 2.95(1)                           |
|                     | Fe - COC | 2 | 0.008(4)   | 2.93                                  | 2.95(1)                           |

<sup>a</sup>k range = 3 – 10.5  $\text{\AA}$ , R range = 1 – 4  $\text{\AA}$ ; k-weighted fit = 1,2,3  $E_0 = 1.16^*$  eV,  $S_0^2 = 0.90$ . R-factor fit: 0.015

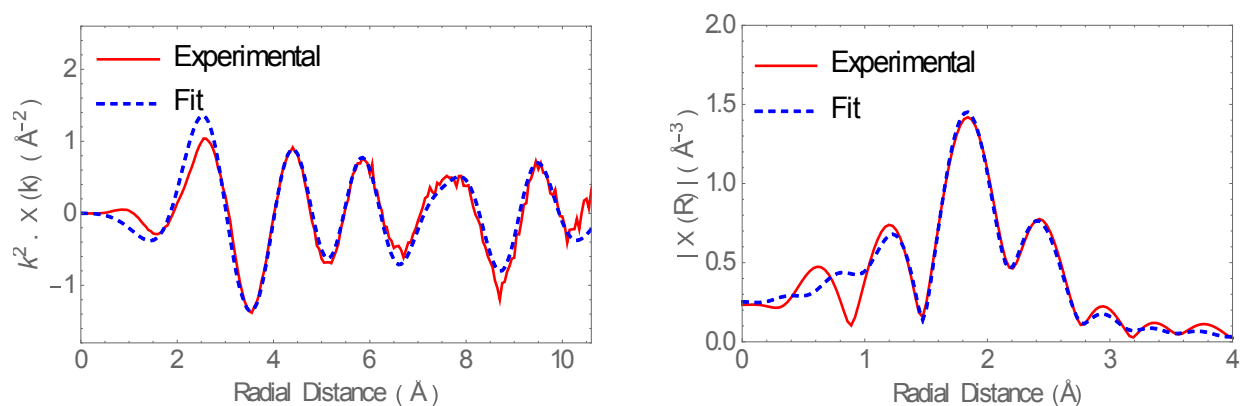

Figure S4. (Left)  $k^2$ -weighted Fe K-edge EXAFS data of [1]<sup>1-</sup> and (right)  $k^2$ -weighted Fourier Transforms of the EXAFS data for  $3 < k < 10.5 \text{ \AA}$  of [1]<sup>1-</sup>. In all plots the data is represented by the solid lines (red), whereas the corresponding fits are the dotted lines (blue).

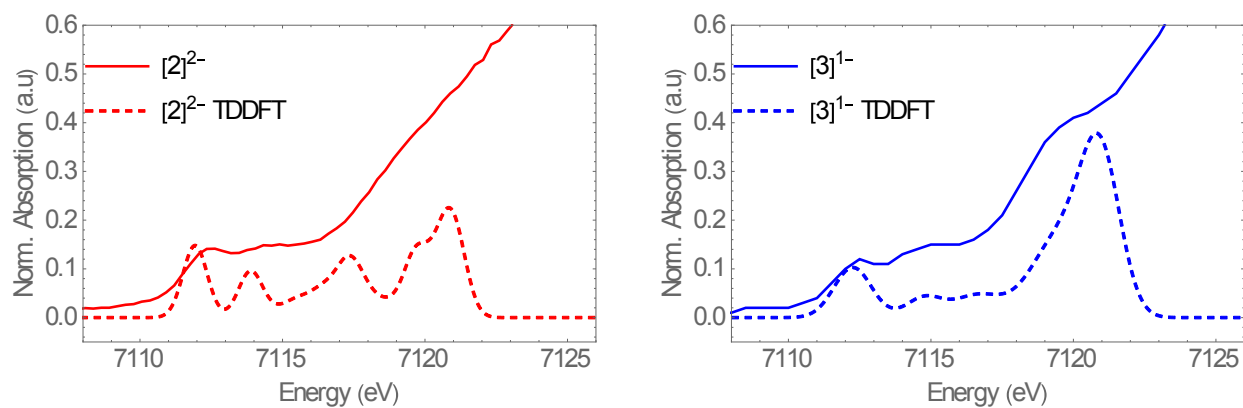

Figure S5. Experimental (solid) and computational (dashed) Fe K edge XANES spectrum of (left)  $[2]^{2-}$  (red) and (right)  $[3]^{1-}$  (blue).

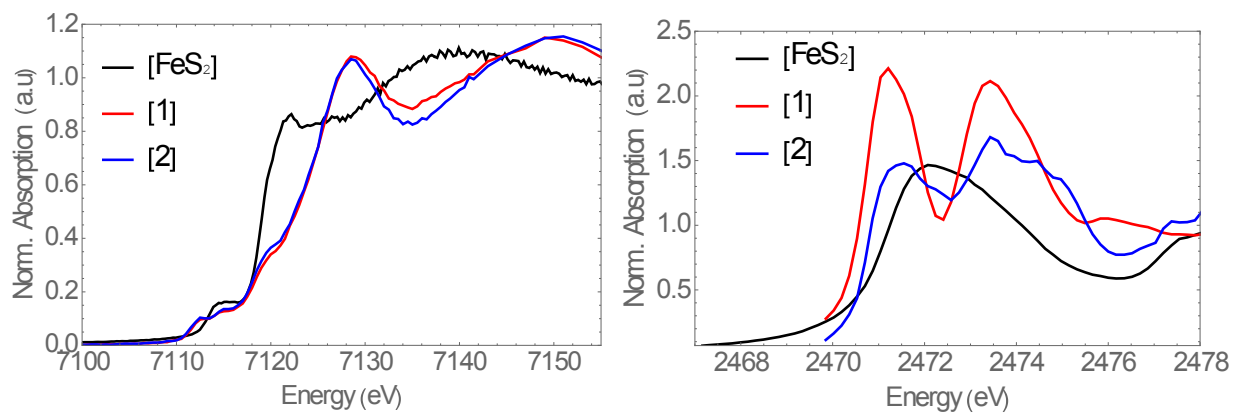

Figure S6. Experimental Fe K-edge (left) and Fe S K-edge (right) XANES spectrum of reference material  $\text{FeS}_2$  and complexes  $[1]$  and  $[2]$ .

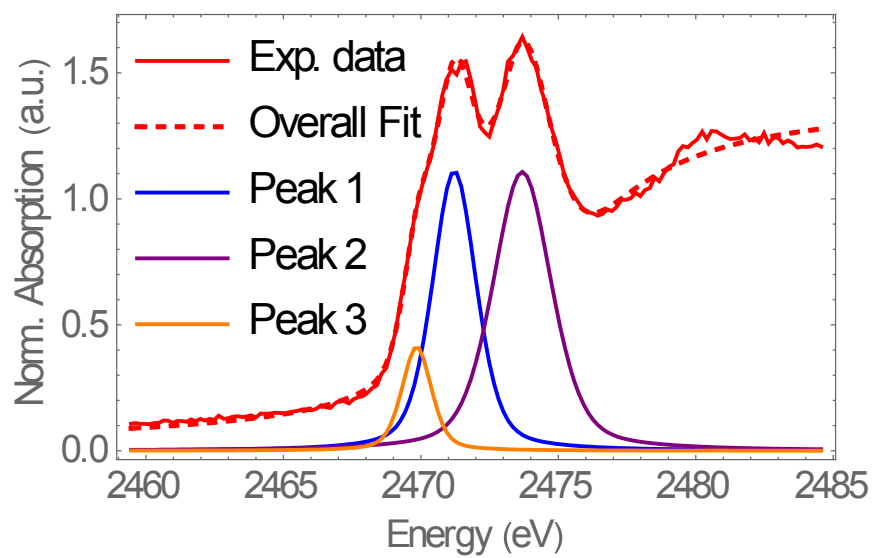

Figure S7. Example of pseudo-Voigt peak fitting of experimental S K edge XANES data of  $[1]^{2-}$ .

### 3. Molecular Orbital analysis

**Table S2. Percentage of Symmetrized Fragment orbitals in the Lowest Unoccupied (LUMO) and Highest Occupied Molecular Orbitals (HOMOs) of [1] – [3].**

| <i>Compound</i> | <i>Molecular Orbital</i> | <i>%Fe</i><br><i>d<sub>z</sub><sup>2</sup></i> | <i>%Fe</i><br><i>d<sub>xy</sub></i> | <i>%Fe</i><br><i>d<sub>xz</sub></i> | <i>%Fe</i><br><i>d<sub>yz</sub></i> | <i>%Fe</i><br><i>d<sub>x<sup>2</sup>-y<sup>2</sup></sub></i> | <i>%S</i><br><i>P<sub>x</sub></i> | <i>%C*</i><br><i>P<sub>x</sub></i> |
|-----------------|--------------------------|------------------------------------------------|-------------------------------------|-------------------------------------|-------------------------------------|--------------------------------------------------------------|-----------------------------------|------------------------------------|
| [1]             | HOMO                     | 13                                             | -                                   | 1                                   | 13                                  | 21                                                           | 9                                 | 13                                 |
|                 | HOMO-1                   | 8                                              | 3                                   | 14                                  | 9                                   | 13                                                           | -                                 | -                                  |
|                 | HOMO-2                   | 10                                             | 40                                  | 9                                   | 5                                   | 8                                                            | -                                 | -                                  |
|                 | LUMO                     | 12                                             | 11                                  | 5                                   | -                                   | 7                                                            | 9                                 | 8                                  |
|                 | LUMO+1                   | 4                                              | 5                                   | 11                                  | 9                                   | 14                                                           | 13                                | 1                                  |
| [2]             | HOMO                     | 9                                              | -                                   | 20                                  | -                                   | 20                                                           | 6                                 | -                                  |
|                 | HOMO-1                   | -                                              | 3                                   | -                                   | 3                                   | -                                                            | 5                                 | 60                                 |
|                 | HOMO-2                   | -                                              | 8                                   | -                                   | 16                                  | -                                                            | 52                                | -                                  |
|                 | LUMO                     | 6                                              | -                                   | 18                                  | -                                   | 20                                                           | 11                                | 5                                  |
|                 | LUMO+1                   | -                                              | 5                                   | -                                   | 10                                  | -                                                            | -                                 | 56                                 |
| [3]             | HOMO                     | -                                              | -                                   | -                                   | -                                   | -                                                            | -                                 | 70**                               |
|                 | HOMO-1                   | 12                                             | -                                   | 17                                  | -                                   | 15                                                           | -                                 | -                                  |
|                 | HOMO-2                   | 34                                             | -                                   | 20                                  | -                                   | 23                                                           | 7                                 | -                                  |
|                 | LUMO                     | -                                              | 4                                   | -                                   | 8                                   | -                                                            | -                                 | -                                  |
|                 | LUMO+1                   | 6                                              | -                                   | 18                                  | -                                   | 20                                                           | 11                                | 3                                  |

\*%C only involves the ligand backbone and not the carbonyl based orbitals.

\*\*%C also involves the %N in the ligand backbone.

## 4. TDDFT input file

Example of a TDDFT input file for sulfur and iron K-edge XANES in case of **[1]**.

```
#!/bin/bash

#SBATCH -N 1
#SBATCH -n 16
#SBATCH -t 80:00:00

module load pre2019
module load adf/2017.107
module load paffinity
module load openmpi/gnu

ulimit -s xxxxxxxx

adf <<eor

ATOMS
1 Fe      2.232898000000      0.481404000000      3.539259000000
2 Fe      4.159515000000      1.340844000000      2.234532000000
3 S       2.551162000000      2.684641000000      3.087046000000
4 S       2.345244000000      0.379512000000      1.273579000000
5 C       2.749762000000      0.788558000000      5.214293000000
6 O       3.103996000000      1.011540000000      6.270994000000
7 C       2.656720000000     -1.253718000000      3.620011000000
8 O       2.911107000000     -2.361243000000      3.651158000000
9 C       5.307832000000      1.910850000000      3.473503000000
10 O      6.038188000000      2.241631000000      4.270644000000
11 C      5.121833000000     -0.165390000000      2.066106000000
12 O      5.750415000000     -1.114908000000      2.014194000000
13 C      0.446337000000      0.379512000000      3.784977000000
14 O     -0.665715000000      0.286480000000      3.940713000000
15 C      4.767849000000      2.281502000000      0.828288000000
16 O      5.128809000000      2.848554000000     -0.087674000000
17 C      1.481689000000      2.895809000000      1.685416000000
18 C      1.374312000000      1.806004000000      0.844439000000
19 C      0.541434000000      1.869502000000     -0.258407000000
20 C     -0.166730000000      3.018375000000     -0.496050000000
21 C     -0.067766000000      4.086029000000      0.323009000000
22 C      0.770799000000      4.038775000000      1.448927000000
23 H      0.463891000000      1.141489000000     -0.831749000000
24 H     -0.726934000000      3.064152000000     -1.236664000000
25 H     -0.556324000000      4.856866000000      0.140740000000
26 H      0.841182000000      4.768264000000      2.021115000000

END
```

SYMMETRY NOSYM

CHARGE -2.0 0.0

BASIS

type QZ4P

core None

createoutput None

END

XC

Hybrid B3LYP

END

EXCITATIONS

Davidson

ONLYSING

lowest 50

NTO

XAS

ALLXASMOMENTS

ALLXASQUADRUPOLE

END

MODIFYEXCITATION

UseOccupied

A 3 %this number can be changed to e.g. 1 to use Fe instead of S 1s)

SubEnd

END

NumericalQuality VeryGood

NOPRINT LOGFILE

eor



## 5. DFT reaction coordinates

All coordinates are shown for OPBE basis set in the gas phase.

### [2]

|    |             |            |            |
|----|-------------|------------|------------|
| Fe | 0.56705532  | 4.74134134 | 3.25529097 |
| Fe | 2.90108696  | 4.71416953 | 2.24246813 |
| S  | 2.18785609  | 3.26463739 | 3.83544929 |
| S  | 2.15787782  | 6.30215298 | 3.68150647 |
| C  | 2.80901121  | 5.92536168 | 0.93479560 |
| C  | -0.42865746 | 4.82539257 | 4.73142470 |
| O  | -1.06510519 | 4.88289133 | 5.69384376 |
| O  | -0.82688329 | 2.55942125 | 1.86261745 |
| O  | -0.83514159 | 6.71444855 | 1.58653286 |
| O  | 5.79900270  | 4.73661024 | 2.72628486 |
| O  | 2.73023128  | 2.53751623 | 0.27374284 |
| O  | 2.75222121  | 6.69651154 | 0.07692385 |
| C  | 2.79861678  | 3.38473709 | 1.05557220 |
| C  | -0.27300094 | 3.40984238 | 2.41410447 |
| C  | 2.88984193  | 3.61151606 | 5.43413965 |
| C  | 3.19442474  | 2.46862506 | 6.16270562 |
| H  | 2.99122166  | 1.49270113 | 5.72221442 |
| C  | 3.75691797  | 2.55111865 | 7.45061119 |
| H  | 3.98496687  | 1.63668854 | 7.99675063 |
| C  | 4.01381575  | 3.78437318 | 8.00654539 |
| C  | 3.71815865  | 4.97740145 | 7.29765493 |
| C  | 3.98792845  | 6.24142289 | 7.88303851 |
| C  | 3.70554487  | 7.40697408 | 7.20656732 |
| H  | 3.91369487  | 8.37614526 | 7.65805331 |
| C  | 3.14278447  | 7.34815218 | 5.91744565 |
| H  | 2.91961861  | 8.27056607 | 5.38162909 |
| C  | 2.86322579  | 6.13190633 | 5.30723267 |
| C  | 3.14195049  | 4.90502906 | 5.97822335 |
| H  | 4.44954380  | 3.86336538 | 9.00295392 |
| H  | 4.42420365  | 6.27189911 | 8.88190104 |
| C  | 4.66064341  | 4.72901989 | 2.52878933 |
| C  | -0.27941528 | 5.94795165 | 2.24824756 |

### [2]<sup>1-</sup>

|    |             |            |            |
|----|-------------|------------|------------|
| Fe | 0.42592518  | 4.74855940 | 3.34435033 |
| Fe | 3.06378157  | 4.70506754 | 2.19865136 |
| S  | 2.14795714  | 3.24714109 | 3.75767667 |
| S  | 2.12900090  | 6.31403722 | 3.59338767 |
| C  | 3.00366634  | 5.88110944 | 0.88647193 |
| C  | -0.42210608 | 4.81149669 | 4.92242396 |
| O  | -1.10626919 | 4.84233369 | 5.86735015 |
| O  | -1.01272621 | 2.61434552 | 1.94315750 |
| O  | -1.07866994 | 6.72575028 | 1.79243222 |

|   |             |            |            |
|---|-------------|------------|------------|
| O | 5.95373177  | 4.74055626 | 2.80788072 |
| O | 2.98813155  | 2.54424979 | 0.22053982 |
| O | 2.99376149  | 6.65465033 | 0.01284274 |
| C | 2.99864528  | 3.40092475 | 1.01284670 |
| C | -0.42394488 | 3.46016134 | 2.49030346 |
| C | 2.84849042  | 3.60290958 | 5.35452971 |
| C | 3.15429720  | 2.47068912 | 6.09899184 |
| H | 2.94820960  | 1.49328235 | 5.66151905 |
| C | 3.71615423  | 2.55740664 | 7.38725600 |
| H | 3.94203369  | 1.64433881 | 7.93980254 |
| C | 3.97489075  | 3.79261621 | 7.93743686 |
| C | 3.68118367  | 4.98066668 | 7.21866210 |
| C | 3.95705087  | 6.24198985 | 7.80750510 |
| C | 3.68071603  | 7.40804362 | 7.12917392 |
| H | 3.89265704  | 8.37782972 | 7.58153235 |
| C | 3.11974584  | 7.34953708 | 5.83922318 |
| H | 2.90088988  | 8.27206767 | 5.30048002 |
| C | 2.83087041  | 6.14059791 | 5.21827280 |
| C | 3.10522578  | 4.90608588 | 5.89625667 |
| H | 4.40983766  | 3.88042072 | 8.93477315 |
| H | 4.39237699  | 6.26676758 | 8.80820896 |
| C | 4.79619542  | 4.73256059 | 2.65868609 |
| C | -0.46476779 | 5.94115108 | 2.39970269 |

**[2]<sup>2-</sup>**

|    |             |            |             |
|----|-------------|------------|-------------|
| Fe | 0.18860246  | 4.88608580 | 3.51889928  |
| Fe | 3.35939968  | 4.83852779 | 2.14263302  |
| S  | 1.99149244  | 3.31101808 | 3.38386039  |
| S  | 2.08861025  | 6.26574489 | 3.50695522  |
| C  | 2.77835698  | 5.59217963 | 0.66046157  |
| C  | -0.38795761 | 5.42929814 | 5.08783151  |
| O  | -0.91789864 | 5.81660514 | 6.07214184  |
| O  | -1.76139244 | 2.71592615 | 3.44930761  |
| O  | -1.08245778 | 6.13707616 | 1.18896594  |
| O  | 6.00855905  | 5.69353646 | 3.07098425  |
| O  | 4.56443194  | 2.62167303 | 0.67631574  |
| O  | 2.56603765  | 6.10604425 | -0.38142051 |
| C  | 4.08199551  | 3.52126373 | 1.26550788  |
| C  | -0.97861940 | 3.59672206 | 3.47721747  |
| C  | 2.69636029  | 3.42210787 | 5.00782428  |
| C  | 2.95704438  | 2.21414827 | 5.65279870  |
| H  | 2.71331680  | 1.29255327 | 5.12221273  |
| C  | 3.51461398  | 2.15546257 | 6.94389695  |
| H  | 3.69957137  | 1.18237166 | 7.40645825  |
| C  | 3.82368340  | 3.31851186 | 7.61773822  |
| C  | 3.58097751  | 4.58137559 | 7.01072801  |
| C  | 3.90440020  | 5.77337075 | 7.71716855  |
| C  | 3.67888274  | 7.00733107 | 7.15125133  |
| H  | 3.92832398  | 7.92158377 | 7.69528239  |
| C  | 3.12134027  | 7.09439873 | 5.85909472  |
| H  | 2.93988772  | 8.06970863 | 5.40591933  |

|   |             |            |            |
|---|-------------|------------|------------|
| C | 2.78795546  | 5.96197075 | 5.12972176 |
| C | 3.01056622  | 4.65690127 | 5.68972083 |
| H | 4.25669747  | 3.29250148 | 8.62071471 |
| H | 4.33555461  | 5.68524884 | 8.71777193 |
| C | 4.91540066  | 5.33764008 | 2.79165568 |
| C | -0.47663633 | 5.62823544 | 2.06568743 |

### [3]

|    |             |            |             |
|----|-------------|------------|-------------|
| Fe | 0.53892931  | 4.74325707 | 3.31125545  |
| Fe | 2.77982941  | 4.76349552 | 2.10777859  |
| S  | 2.21541681  | 3.26914428 | 3.71972899  |
| S  | 2.14257714  | 6.31630954 | 3.63591715  |
| O  | 5.42253461  | 2.74222302 | 9.63622537  |
| O  | 5.32879625  | 7.32046285 | 9.50138163  |
| O  | -0.89638957 | 4.77381197 | 5.87593074  |
| O  | -0.93072293 | 2.59471991 | 1.94650456  |
| O  | -1.03370504 | 6.74297231 | 1.83916969  |
| O  | 5.70902168  | 4.85115357 | 2.33310905  |
| O  | 2.51214885  | 2.61804529 | 0.11672338  |
| O  | 2.38958417  | 6.76996185 | -0.00438835 |
| N  | 5.34935803  | 5.03139227 | 9.59144670  |
| N  | 10.36076309 | 5.13663093 | 10.26059462 |
| C  | 3.04082709  | 3.59406766 | 5.26256292  |
| C  | 3.41626933  | 2.44016272 | 5.94353215  |
| H  | 3.18797951  | 1.46939963 | 5.50395694  |
| C  | 4.07984186  | 2.50450397 | 7.17553118  |
| H  | 4.37294616  | 1.59788762 | 7.70308516  |
| C  | 4.37466060  | 3.73273032 | 7.74165246  |
| C  | 4.00722015  | 4.92990561 | 7.07647310  |
| C  | 4.32145132  | 6.17811092 | 7.67149530  |
| C  | 3.97297253  | 7.35783598 | 7.03687787  |
| H  | 4.22600088  | 8.30510715 | 7.51100449  |
| C  | 3.30692446  | 7.32246294 | 5.80507670  |
| H  | 3.03506354  | 8.25554614 | 5.31196301  |
| C  | 2.98332591  | 6.11621324 | 5.19154018  |
| C  | 3.32646572  | 4.87875523 | 5.81134824  |
| C  | 5.08255495  | 3.76364768 | 9.04766689  |
| C  | 5.03051754  | 6.25294716 | 8.97513089  |
| C  | 6.07124258  | 5.08341536 | 10.88354701 |
| H  | 5.76779423  | 4.19901583 | 11.45181154 |
| H  | 5.73775078  | 5.99099327 | 11.39566604 |
| C  | 7.57063890  | 5.10231391 | 10.68051257 |
| C  | 8.26299009  | 6.30778424 | 10.52364005 |
| H  | 7.72823012  | 7.25680832 | 10.55084338 |
| C  | 9.64371258  | 6.26975382 | 10.31865229 |
| H  | 10.20511605 | 7.19954025 | 10.19577743 |
| C  | 9.68572954  | 3.98667919 | 10.41076013 |
| H  | 10.28051301 | 3.07088130 | 10.36203109 |
| C  | 8.30666500  | 3.91457779 | 10.62000334 |
| H  | 7.80770797  | 2.95138673 | 10.72305219 |

|   |             |            |            |
|---|-------------|------------|------------|
| C | -0.33890771 | 4.76203109 | 4.86496432 |
| C | -0.34855579 | 3.43105914 | 2.48822770 |
| C | -0.41166411 | 5.96532379 | 2.42240724 |
| C | 4.55916766  | 4.81634050 | 2.23713911 |
| C | 2.61703706  | 3.45405339 | 0.90529949 |
| C | 2.54279177  | 5.98937763 | 0.83166860 |

**[3]<sup>1-</sup>**

|    |             |            |             |
|----|-------------|------------|-------------|
| Fe | 0.51502945  | 4.76192609 | 3.29463686  |
| Fe | 2.75058486  | 4.69346844 | 2.07499152  |
| S  | 2.17468341  | 3.25558577 | 3.76418598  |
| S  | 2.19281316  | 6.28673460 | 3.62340502  |
| O  | 5.40931542  | 2.72726260 | 9.65645068  |
| O  | 5.42300292  | 7.31645382 | 9.45471326  |
| O  | -0.93410227 | 4.93067215 | 5.83970510  |
| O  | -1.02858839 | 2.60655395 | 2.01887946  |
| O  | -0.97155862 | 6.77342640 | 1.74517970  |
| O  | 5.67782962  | 4.65063603 | 2.25648091  |
| O  | 2.34655315  | 2.53262144 | 0.11933237  |
| O  | 2.43785465  | 6.69538755 | -0.05891819 |
| N  | 5.38398462  | 5.02302988 | 9.53720016  |
| N  | 10.42250992 | 5.33735044 | 10.53481653 |
| C  | 3.01264734  | 3.57747768 | 5.27271744  |
| C  | 3.36758250  | 2.40677017 | 5.97784603  |
| H  | 3.10506597  | 1.44032700 | 5.54644342  |
| C  | 4.03318983  | 2.47084423 | 7.18804348  |
| H  | 4.30930833  | 1.56894801 | 7.73280953  |
| C  | 4.37079850  | 3.71452928 | 7.74656847  |
| C  | 4.03262450  | 4.91690349 | 7.06711710  |
| C  | 4.38040692  | 6.17304698 | 7.63459686  |
| C  | 4.05225126  | 7.36367680 | 6.96638541  |
| H  | 4.33577643  | 8.30872838 | 7.42784098  |
| C  | 3.38750745  | 7.32317889 | 5.75458275  |
| H  | 3.13316705  | 8.24854066 | 5.23687229  |
| C  | 3.02385463  | 6.09627818 | 5.15801648  |
| C  | 3.33851008  | 4.86210507 | 5.80001228  |
| C  | 5.07560843  | 3.74195395 | 9.02532924  |
| C  | 5.08503093  | 6.25458040 | 8.91123683  |
| C  | 6.09178655  | 5.08583720 | 10.81001308 |
| H  | 5.84582525  | 4.16663216 | 11.35755988 |
| H  | 5.72059785  | 5.95928798 | 11.35935671 |
| C  | 7.59580605  | 5.18546550 | 10.68275826 |
| C  | 8.37331424  | 5.48714507 | 11.80710445 |
| H  | 7.90090405  | 5.67878173 | 12.77269514 |
| C  | 9.76019797  | 5.54957459 | 11.68445076 |
| H  | 10.37661947 | 5.78803861 | 12.55639166 |
| C  | 9.66726637  | 5.05073945 | 9.46234888  |
| H  | 10.20824018 | 4.87982324 | 8.52740835  |
| C  | 8.27410665  | 4.96360536 | 9.48348460  |
| H  | 7.72497882  | 4.72781703 | 8.57246041  |

|   |             |            |            |
|---|-------------|------------|------------|
| C | -0.35806157 | 4.86203289 | 4.83590422 |
| C | -0.40173037 | 3.43827808 | 2.53012184 |
| C | -0.36794210 | 6.00108701 | 2.36581129 |
| C | 4.52086918  | 4.66852963 | 2.18567116 |
| C | 2.50328899  | 3.36390955 | 0.91341801 |
| C | 2.55664278  | 5.92722202 | 0.80237452 |
